# Supplementary material for: Hearing loss in children with Fabry disease
Source: J Inherit Metab Dis. 2017 May 31;40(5):725–31. doi: 10.1007/s10545-017-0051-5 (PMC5579138; doi:10.1007/s10545-017-0051-5)
Supplement: Supplementary file 1 — (DOCX 23.5 kb) [file 10545_2017_51_MOESM1_ESM.docx]

## Sheet: Blad1
DUTCH
Pt number	Gender	DS3 score		PNS	Acroparesthesia	Sweating	GI disturbance	Renal	eGFR	Proteinuria	GFRslope	Cardiac	LVH	Arrythmia	NYHA	CNS	White matter	TIA/stroke
Pt 1	F	0		0	0	0	0	0	0	0	0	0	0	0	0	0	0	0
Pt 2	F	6		6	1	0	5	0	0	0	0	0	0	0	0	0	0	0
Pt 3	M	1		1	1	0	0	0	0	0	0	0	0	0	0	0	0	0
Pt 4	M	8		7	5	2	0	0	0	0	0	0	0	0	0	1	1	0
Pt 5	F	0		0	0	0	0	0	0	0	0	0	0	0	0	0	0	0
Pt 6	F	1		1	1	0	0	0	0	0	0	0	0	0	0	0	0	0
Pt 7	M	11		11	4	2	5	0	0	0	0	0	0	0	0	0	0	0
Pt 8	F	3		3	1	2	0	0	0	0	0	0	0	0	0	0	0	0
Pt 9	M	9		8	1	2	5	1	0	1	0	0	0	0	0	0	0	0
Pt 10	F	10		9	4	0	5	0	0	0	0	0	0	0	0	1	1	0
Pt 11	F	6		6	1	0	5	0	0	0	0	0	0	0	0	0	0	0
Pt 12	M	6		6	1	0	5	0	0	0	0	0	0	0	0	0	0	0
Pt 13	M	13		12	5	2	5	0	0	0	0	0	0	0	0	1	1	0
Pt 14	M	15		12	5	2	5	3	0	3	0	0	0	0	0	0	0	0
Pt 15	M	13		12	5	2	5	0	0	0	0	0	0	0	0	1	1	0
Pt 16	F	1		1	1	0	0	0	0	0	0	0	0	0	0	0	0	0
Pt 17	M	4		4	4	0	0	0	0	0	0	0	0	0	0	0	0	0
Pt 18	F	6		6	1	0	5	0	0	0	0	0	0	0	0	0	0	0
Pt 19	F	12		11	4	2	5	0	0	0	0	0	0	0	0	1	1	0
Pt 20	F	9		9	4	0	5	0	0	0	0	0	0	0	0	0	0	0
Pt 21	F	6		6	1	0	5	0	0	0	0	0	0	0	0	0	0	0
Pt 22	F	5		5	5	0	0	0	0	0	0	0	0	0	0	0	0	0
Pt 23	F	1		1	1	0	0	0	0	0	0	0	0	0	0	0	0	0
Pt 24	F	5		5	5	0	0	0	0	0	0	0	0	0	0	0	0	0
Pt 25	F	0		0	0	0	0	0	0	0	0	0	0	0	0	0	0	0
Pt 26	M	5		5	0	0	5	0	0	0	0	0	0	0	0	0	0	0
Pt 27	F	0		0	0	0	0	0	0	0	0	0	0	0	0	0	0	0
Pt 28	M	6		6	1	0	5	0	0	0	0	0	0	0	0	0	0	0
NORWEGIAN
Pt number	Gender	DS3 score		PNS	Acroparesthesia	Sweating	GI disturbance	Renal	eGFR	Proteinuria	GFRslope	Cardiac	LVH	Arrythmia	NYHA	CNS_c	White matter	TIA/stroke
Pt 1	M	5		5	0	0	5	0	0	0	0	0	0	0	0	0	0	0
Pt 2	F	5		5	0	0	5	0	0	0	0	0	0	0	0	0	0	0
Pt 3	F	0		0	0	0	0	0	0	0	0	0	0	0	0	0	0	0
Pt 4	F	0		0	0	0	0	0	0	0	0	0	0	0	0	0	0	0
Pt 5	M	6		6	4	2	0	0	0	0	0	0	0	0	0	0	0	0
Pt 6	M	6		6	4	2	0	0	0	0	0	0	0	0	0	0	0	0
Pt 7	F	0		0	0	0	0	0	0	0	0	0	0	0	0	0	0	0
Pt 8	F	11		11	4	2	5	0	0	0	0	0	0	0	0	0	0	0
Pt 9	M	11		11	4	2	5	0	0	0	0	0	0	0	0	0	0	0
Pt 10	F	0		0	0	0	0	0	0	0	0	0	0	0	0	0	0	0
Pt 11	M	12		12	5	2	5	0	0	0	0	0	0	0	0	0	0	0
Pt 12	M	1		1	1	0	0	0	0	0	0	0	0	0	0	0	0	0
Pt 13	F	10		10	5	0	5	0	0	0	0	0	0	0	0	0	0	0
Pt 14	F	11		11	4	2	5	0	0	0	0	0	0	0	0	0	0	0
Pt 15	F	0		0	0	0	0	0	0	0	0	0	0	0	0	0	0	0
Pt 16	F	0		0	0	0	0	0	0	0	0	0	0	0	0	0	0	0
Pt 17	M	6		6	4	2	0	0	0	0	0	0	0	0	0	0	0	0
Pt 18	M	13		12	5	2	5	0	0	0	0	0	0	0	0	0	0	0
Pt 19	M	12		12	5	2	5	0	0	0	0	0	0	0	0	0	0	0
